# Supplementary material
Source: publisher site journal article supplement (https://www.dovepress.com/article/352641)
Supplement: Supplementary file 1 [file get_supplementary_file.php]

**Table S1** 3-month mortality related to patients with different eGFR level and dialysis-dependent patients

| Variables | Alive  403(80.3) | Dead  99(19.7) | P value |
| --- | --- | --- | --- |
| eGFR level |  |  | 0.847 |
| 30 < eGFR <60 | 345(85.6) | 83(83.8) |  |
| 15 < eGFR ≤30 | 39(9.7) | 10(10.1) |  |
| eGFR ≤15 | 19(4.7) | 6(6.1) |  |
| Dialysis-dependent | 3(0.7) | 1(1.0) | 0.790 |

**Table S2** Baseline Characters of the training and external validation set.

| **Variables** | **Training set**  **502 (82.3%)** | **External validation set**  **108 (17.7%)** | **p-value** |
| --- | --- | --- | --- |
| **Baseline data** |  |  |  |
| Age (years) | 79(70-84) | 77(67.5-84) | 0.183 |
| Sex |  |  | 0.272 |
| female | 199(39.6) | 49(45.4) |  |
| male | 303(60.4) | 59(54.6) |  |
| BMI | 24.22(22.03-26.24) | 25.54(22.22-28.64) | 0.002 |
| SBP | 140.0(130.0-160) | 149.5(133.0-160.5) | 0.199 |
| DBP | 80(74-90) | 88(80-95) | 0.014 |
| Urea | 8.14(6.60-10.4) | 6.31(5.25-8.29) | <0.001 |
| Fasting Blood Glucose | 5.70(4.76-7.41) | 5.66(4.78-7.36) | 0.994 |
| INR | 0.99(0.95-1.06) | 0.94(0.89-1.01) | <0.001 |
| Platelet | 178(145-222) | 190(152-234) | 0.228 |
| Total cholesterol | 4.18(3.49-5.01) | 4.12(3.43-4.94) | 0.684 |
| Triglyceride | 1.23(0.84-1.71) | 1.24(0.93-1.75) | 0.506 |
| High-density lipoprotein | 1.03(0.85-1.23) | 1.01(0.89-1.30) | 0.421 |
| Low-density lipoprotein | 2.46(1.89-3.16) | 2.35(1.83-3.33) | 0.817 |
| Glycosylated hemoglobin | 6.10(5.60-6.91) | 6.0(5.6-7.0) | 0.458 |
| Creatinine | 116.5(102.0-139.0) | 105.90(70.05-131.55) | <0.001 |
| eGFR | 48.45(37.36-54.51) | 46.08(36.92-53.94) |  |
| 30 < eGFR ≤60 | 428(85.3) | 91(84.3) | 0.791 |
| 15 < eGFR ≤30 | 49(9.8) | 8(7.4) | 0.446 |
| eGFR ≤15 | 25(5.0) | 9(8.3) | 0.168 |
| Premorbid mRS | 0(0-2) | 0(0-0) | <0.001 |
| NIHSS on admission | 5(2-13) | 4(2-11) | 0.018 |
| TOAST |  |  |  |
| LAA | 213(42.4) | 56(52.8) | 0.050 |
| CE | 153(30.5) | 24(22.6) | 0.107 |
| SAO | 111(22.1) | 24(22.6) | 0.905 |
| SOC | 3(0.6) | 0(0.0) | 1.000 |
| SUC | 22(4.4) | 2(1.9) | 0.406 |
| Dyslipidemia | 158(31.5) | 32(30.5) | 0.841 |
| Aphasia | 81(16.1) | 18(16.7) | 0.892 |
| Hemiplegia | 389(77.5) | 81(75.0) | 0.577 |
| **Medical history** |  |  |  |
| Coronary heart disease | 125(24.9) | 17(15.7) | 0.041 |
| Atrial fibrillation | 111(22.1) | 22(20.4) | 0.691 |
| Diabetes mellitus | 165(32.9) | 37(34.3) | 0.781 |
| Hypertension | 413(82.3) | 90(83.3) | 0.792 |
| Hyperlipidaemia | 6(1.2) | 3(2.8) | 0.202 |
| Heart failure | 8(1.6) | 4(3.7) | 0.240 |
| TIA/Stroke | 106(21.1) | 22(20.4) | 0.863 |
| [Intracranial](javascript:;) [hemorrhage](javascript:;) | 17(3.4) | 3(2.8) | 0.747 |
| Drinking |  |  | 0.001 |
| Never | 359(71.5) | 91(84.3) |  |
| Cessation | 64(12.7) | 1(0.9) |  |
| Current | 79(15.7) | 16(14.8) |  |
| Smoking |  |  | <0.001 |
| Never | 288(57.4) | 80(74.1) |  |
| Cessation | 86(17.1) | 3(2.8) |  |
| Current | 128(25.5) | 25(23.1) |  |
| Lipid-lowering therapy | 58(11.6) | 12(11.1) | 0.896 |
| Antihypertensive therapy | 299(59.6) | 63(58.3) | 0.814 |
| Antiplatelet therapy | 99(19.7) | 15(13.9) | 0.158 |
| Anticoagulation [therapy](javascript:;) | 15(3.0) | 3(2.8) | 0.907 |

**Notes:**

**Abbreviations:** BMI, body mass index; SBP, Systolic Blood Pressure; DBP, Diastolic Blood Pressure; INR, international normalized ratio; eGFR, estimated glomerular filtration rate; mRS, modified Ranking Scale; NIHSS, National Institutes of Health Stroke Scale; TOAST, Trial of Org 10172 in Acute Stroke Treatment; LAA, large artery atherosclerosis; CE, cardioembolism; SAO, small artery occlusion; SOC, stroke of other determined cause; SUC, stroke of undetermined cause TIA, transient ischemic attacks.

**Data are given as n (%) and median (interquartile range).**

**Table S3** In-hospital Characters of the training and external validation set.

| **Variables** | **Training set**  **502 (82.3%)** | **External validation set**  **108 (17.7%)** | **p-value** |
| --- | --- | --- | --- |
| In-hospital therapy |  |  |  |
| Mechanical thrombectomy | 69(13.7) | 20(18.5) | 0.202 |
| Intravenous thrombolysis | 118(23.5) | 43(39.8) | <0.001 |
| Lipid-lowering therapy | 477(95.0) | 103(95.4) | 0.879 |
| Antihypertensive therapy | 346(68.9) | 77(71.3) | 0.628 |
| Antiplatelet therapy | 460(91.6) | 102(94.4) | 0.325 |
| Anticoagulation therapy | 80(15.9) | 24(22.2) | 0.115 |
| De-fibrinogen therapy | 62(12.4) | 7(6.5) | 0.081 |
| In-hospital disease |  |  |  |
| Electrolyte disturbance | 242(48.2) | 66(61.1) | 0.015 |
| [Deep](javascript:;) [venous](javascript:;) [thrombosis](javascript:;) | 2(0.4) | 0(0.0) | 1.000 |
| Gastrointestinal bleeding | 11(2.2) | 0(0.0) | 0.227 |
| [Epilepsy](javascript:;) | 6(1.2) | 3(2.8) | 0.202 |
| [Respiratory infection](javascript:;) | 210(41.8) | 39(36.1) | 0.272 |
| Hemorrhagic transformation | 29(5.8) | 7(6.5) | 0.778 |
| [Coronary](javascript:;) [heart](javascript:;) [disease](javascript:;) | 19(3.8) | 6(5.6) | 0.421 |
| [Atrial](javascript:;) [fibrillation](javascript:;) | 57(11.4) | 10(9.3) | 0.528 |
| Diabetes mellitus | 35(7.0) | 7(6.5) | 0.855 |
| Hypertension | 19(3.8) | 8(7.4) | 0.118 |
| Hyperlipidaemia | 22(4.4) | 10(9.3) | 0.039 |
| Early neurological deterioration | 42(8.4) | 10(9.3) | 0.763 |
| Poor outcome | 286(57.0) | 41(38.0) | <0.001 |

**Notes:**

**Data are given as n (%) and median (interquartile range).**

**
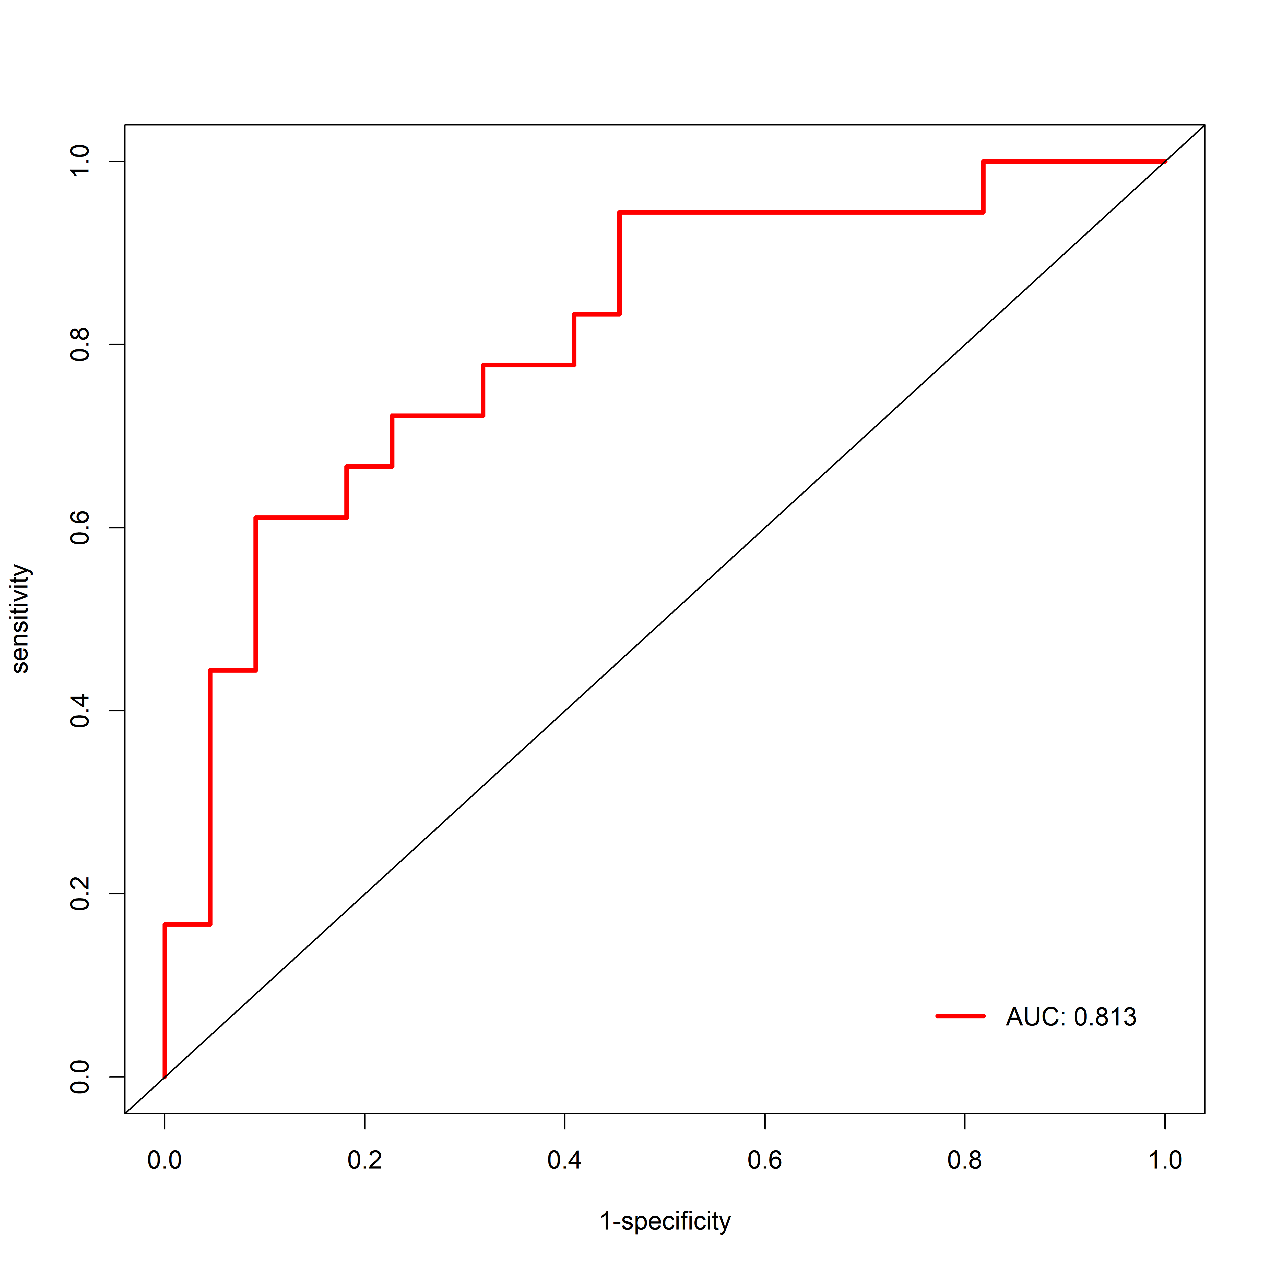
 Figure S1** ROC curves of nomogram in subgroup external validation set.

**
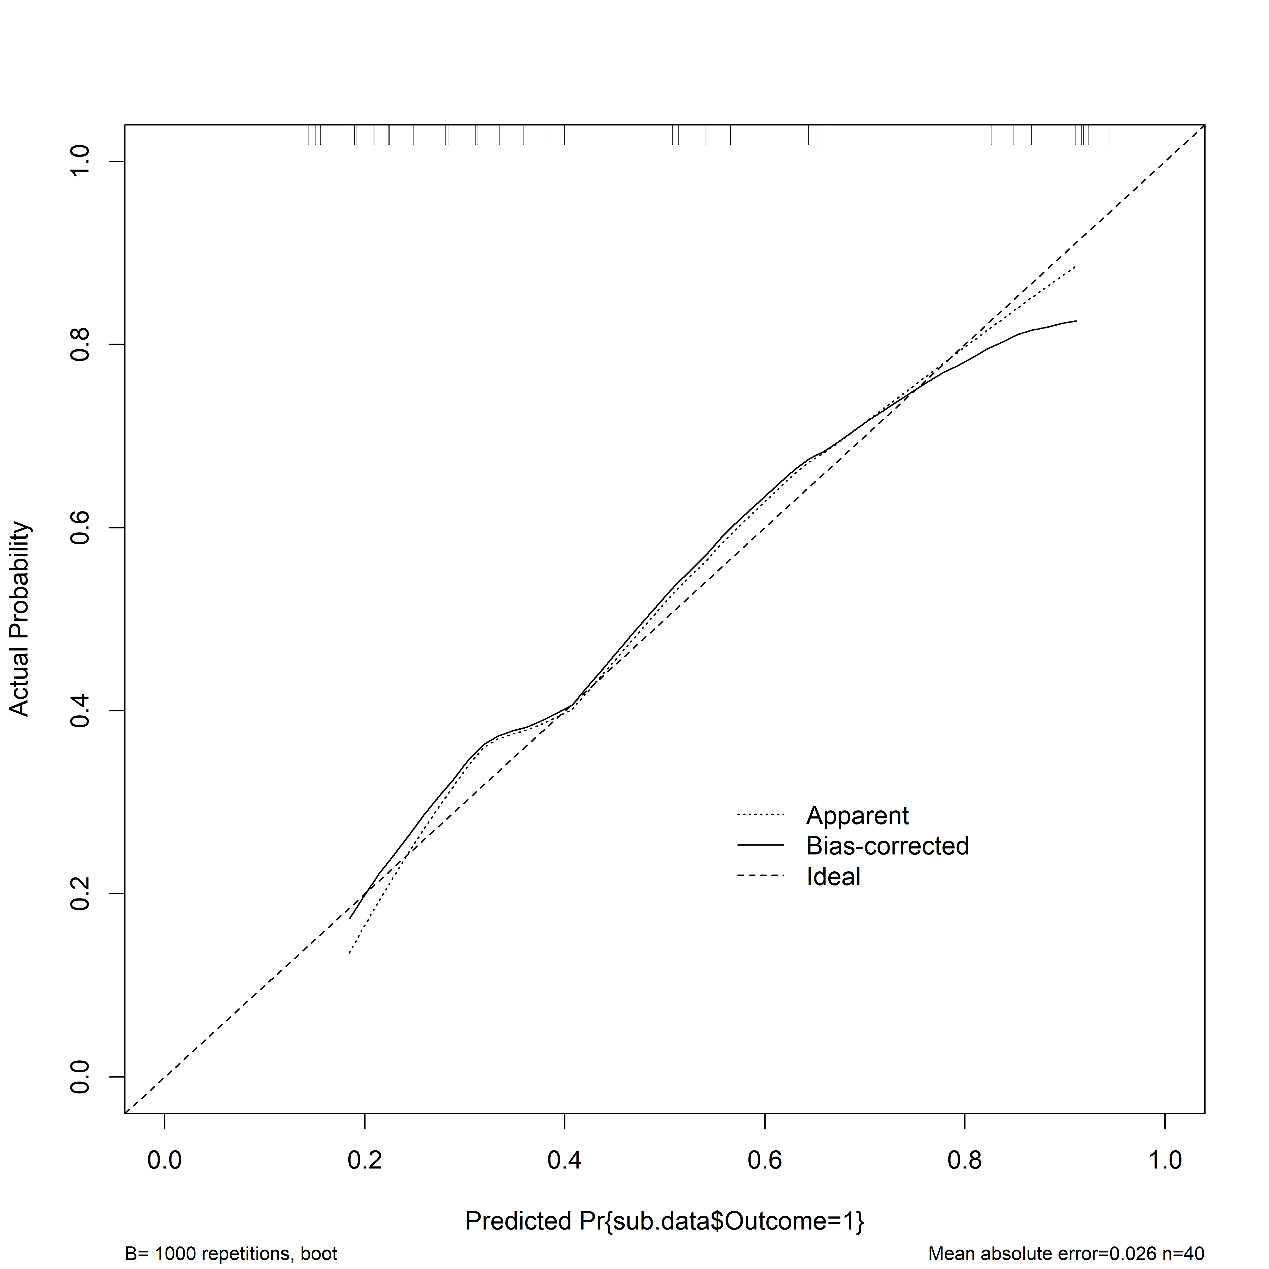
 Figure S2** Calibration curve of nomogram in subgroup external validation set.

**
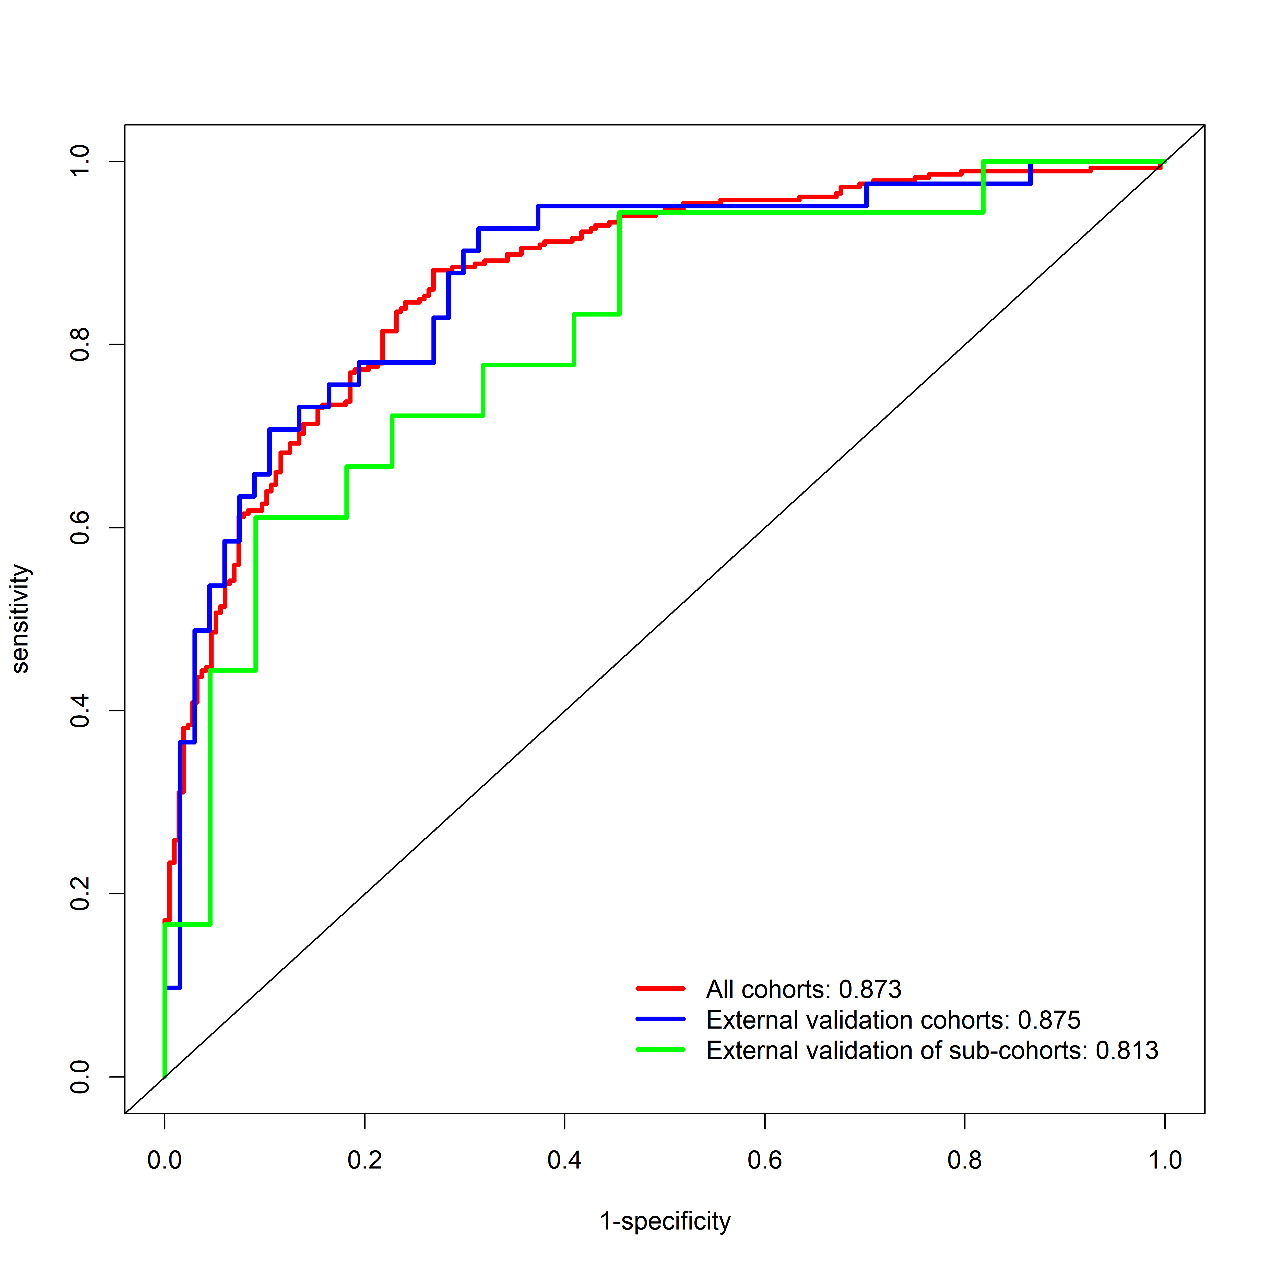
 Figure S3** Comparison of allROC curves.
